# Supplementary material for: Nitrogen Deficiency Enhances Eggplant Defense against Western Flower Thrips via the Induction of the Jasmonate Pathway
Source: MDPI journal article supplement (doi:10.3390/plants13020273), 2024-01-17
Supplement: s1 [file s1]

*Supplementary Material*

**Nitrogen Deficiency Enhances Eggplant Defense against  
Western Flower Thrips via the Induction of the Jasmonate Pathway**

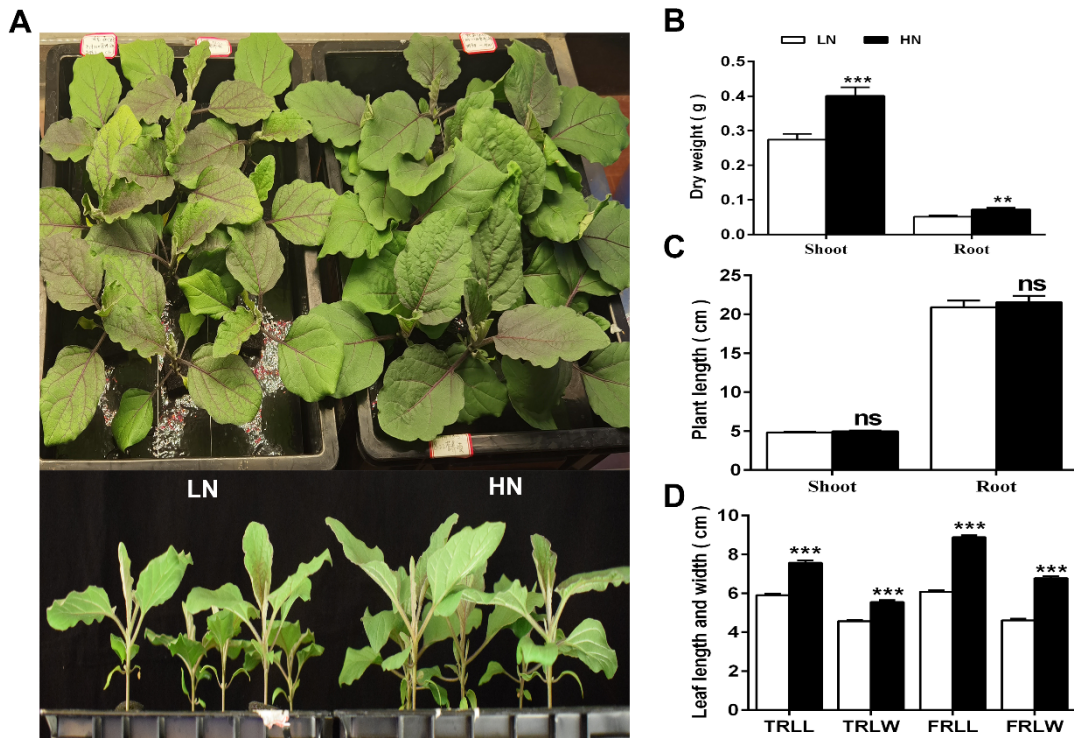

**Supplementary Figure S1.** Effect of nitrogen supply levels on eggplant growth. (A) Seedling morphology after nitrogen treatment. Fifteen-day-old seedlings were transplanted to nutrient solution containing 0.25mM  $\text{Ca}(\text{NO}_3)_2$  (LN) or 2.5 mM  $\text{Ca}(\text{NO}_3)_2$  (HN) and cultured for 5 days, and seedling morphology was taken. The dry weight (B), plant length (C) and leaf length and width (D) of eggplant shoot and root were determined. Mean  $\pm$  SE based on 15, 15 and 20 biological duplications for dry weight, plant length and leaf length and width, respectively. Asterisks (\*) indicate a significant difference from the indicated samples at \*\*  $P < 0.01$  or \*\*\*  $P < 0.001$  by Student's *t*-test, ns means no significant difference. TRLL, the third real leaf length; TRLW, the third real leaf width; FRLL, the four real leaf length; FRLW, the four real leaf width.

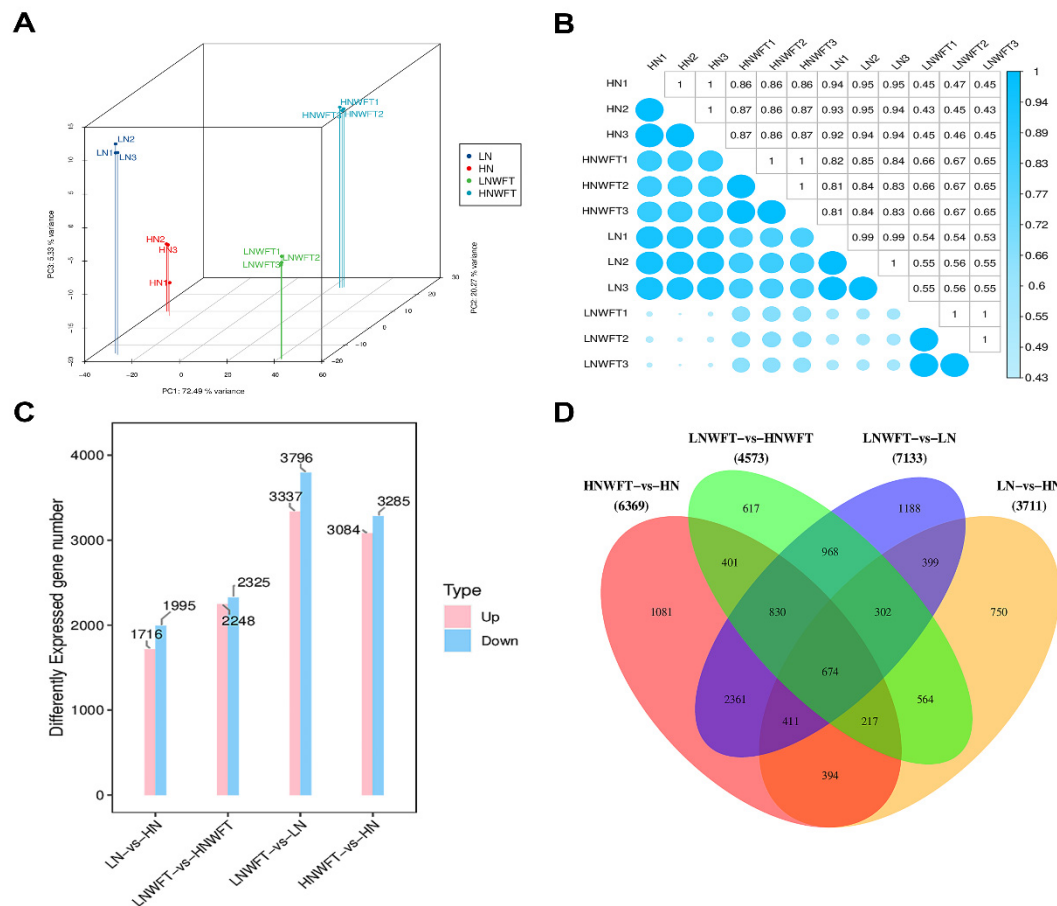

**Supplementary Figure S2.** Quality determination and differential gene analysis of RNA-Seq. The RNA-Seq metrics for quality control was shown as PCA analysis (A), correlation analysis (B) among LN, HN, LNWFT and HNWFT group. The overview of differentially expressed gene under treatments was shown in (C). Venn diagram analysis of differential genes under treatment was shown in (D). LN, 0.25 mM  $\text{Ca}(\text{NO}_3)_2$  cultured for 5 days; HN, 2.5 mM  $\text{Ca}(\text{NO}_3)_2$  cultured for 5 days; LNWFT, 0.25 mM  $\text{Ca}(\text{NO}_3)_2$  cultured for 5 days, then infested by *Frankliniella occidentalis* (WFT) for 24 h; HNWFT, 2.5 mM  $\text{Ca}(\text{NO}_3)_2$  cultured for 5 days, then infested by WFT for 24 h.

**Supplementary Table S1.** Real time PCR of differentially expressed genes from nitrogen sufficient and nitrogen deficient under WFT infestation for 24 h.

| Gene            | Gene ID       | qPCR                                              | FC    | RNA-Seq |                |
|-----------------|---------------|---------------------------------------------------|-------|---------|----------------|
|                 |               | Sequence (5'-3')                                  |       | FC      | <i>p</i> value |
| <i>SmLOX1.4</i> | smechr0800437 | ggagggatcaaacttctca<br>attccttcaccgtctgttcg       | 6.57  | 3.23    | 9.26E-11       |
| <i>SmACX1</i>   | smechr0802140 | catttcacaacttggcactgga<br>ttagcacaggcaacagacatcc  | 4.33  | 2.90    | 8.77E-114      |
| <i>SmJAR1</i>   | smechr0400026 | ccgagtcactgtcccatcca<br>gaagagttcaggaatcaagccata  | 10.60 | 4.41    | 8.00E-120      |
| <i>SmMYC1</i>   | smechr0800006 | gggcgtatgctatcttctgg<br>tgttcttatcctctcaccccta    | 2.64  | 2.24    | 6.09E-40       |
| <i>SmPAL1</i>   | smechr0500713 | aatggcactgctgttggc<br>cttgatacatcaatcagagggttg    | 12.42 | 10.64   | 0              |
| <i>SmSPI5</i>   | smechr0302523 | ctttatgtttacttcccttgtgg<br>aattgggttaccttctgtgtct | 9.07  | 8.15    | 0              |
| <i>SmKTI5</i>   | smechr0502188 | gtactacatacttctgcccaca<br>cagattgaacaaccgatgagg   | 42.57 | 25.70   | 1.79E-61       |

**Supplementary Table S2.** Primers of genes related to hormonal pathways are suitable for real-time qRT-PCR.

| Gene            | Gene ID       | Sequence (5'-3')                                 | Tm(°C)       | Amplicon size(bp) |
|-----------------|---------------|--------------------------------------------------|--------------|-------------------|
| <i>SmActin</i>  | GU984779.1    | tggtcgggaatgggacagaag<br>ctcagtcaggagaacagggt    | 59.9<br>59.9 | 191               |
| <i>SmLOX6</i>   | Smechr0300720 | ggatatttgatgcctgtcggtat<br>aaatggttgcgtcattagagc | 56.6<br>56.1 | 154               |
| <i>SmAOS3</i>   | Smechr0100287 | gttcaatgcttatggaggatg<br>tcatttgccagccgagtgt     | 58.2<br>57.6 | 96                |
| <i>SmAOC</i>    | Smechr0202404 | atcaagcacgaagaggagaag<br>ggtagcggcgaggtaagtg     | 58.0<br>61.9 | 129               |
| <i>SmOPR3</i>   | Smechr0700225 | gcctcggcttagcagttgtt<br>gtcccttggtatgcgttcct     | 59.9<br>59.9 | 184               |
| <i>SmEDS1</i>   | Smechr0602466 | gcctaagcgttatcggttcac<br>acatcattgccaaggagggtac  | 60.0<br>58.2 | 198               |
| <i>SmSABP2</i>  | Smechr0300521 | ggtaggacatagcatgggtggc<br>caagattaaggtaggagcaggc | 63.8<br>62.0 | 116               |
| <i>SmWRKY53</i> | Smechr0802466 | caaagtctcgcaacttaca<br>ggaataaccccccaacaaat      | 55.8<br>55.8 | 168               |
| <i>SmMPK3</i>   | Smechr0600486 | aactcccgcaacatccac<br>tctgttcttctctatcccttg      | 57.3<br>58.2 | 231               |
| <i>SmMPK7</i>   | Smechr0202318 | cttattgcagcgaatgtca<br>gcatcatctcccgaatcact      | 55.8<br>57.8 | 176               |

**Supplementary Table S3.** Hormone quantitative standard curve linear equation and correlation coefficient of detected substance by LC-MS/MS analysis.

| Index             | RT   | Equation                | r       | Weighting          |
|-------------------|------|-------------------------|---------|--------------------|
| JA                | 5.77 | y = 0.08013 x + 0.00434 | 0.99908 | 1 / x              |
| H <sub>2</sub> JA | 6.14 | y = 0.11283 x + 0.00364 | 0.99422 | 1 / x <sup>2</sup> |
| JA-Ile            | 6.30 | y = 0.30959 x + 0.00153 | 0.99886 | 1 / x <sup>2</sup> |
| JA-Phe            | 6.36 | y = 0.71968 x + 0.00763 | 0.99008 | 1 / x <sup>2</sup> |
| JA-Val            | 5.98 | y = 1.04346 x + 0.00282 | 0.99763 | 1 / x <sup>2</sup> |
| OPDA              | 7.23 | y = 1.88724 x + 0.05384 | 0.99026 | 1 / x <sup>2</sup> |
| MeJA              | 6.88 | y = 0.60087 x + 0.01723 | 0.99959 | 1 / x              |
| SA                | 5.04 | y = 0.10099 x + 0.01138 | 0.99994 | 1 / x              |
| SAG               | 3.57 | y = 0.03450 x + 0.00254 | 0.99503 | 1 / x <sup>2</sup> |

**Supplementary Table S4.** Quantitative measurements of hormones associated with jasmonic acid (JA) and salicylic acid (SA) were taken in eggplant leaves inoculated with WFT at 0, 3, 9 and 24 h.

| Index             | Group | N | Mean      | SE         | P                      |
|-------------------|-------|---|-----------|------------|------------------------|
| H <sub>2</sub> JA | LN0   | 3 | 0.87932   | 0.066177   |                        |
| H <sub>2</sub> JA | HN0   | 3 | 0.59965   | 0.023926   | 0.016479*              |
| H <sub>2</sub> JA | LN3   | 3 | 0.91857   | 0.046153   |                        |
| H <sub>2</sub> JA | HN3   | 3 | 0.54944   | 0.008996   | 0.001423**             |
| H <sub>2</sub> JA | LN9   | 3 | 0.68557   | 0.028366   |                        |
| H <sub>2</sub> JA | HN9   | 3 | 0.61768   | 0.039876   | 0.237631 <sup>ns</sup> |
| H <sub>2</sub> JA | LN24  | 3 | 0.77136   | 0.018745   |                        |
| H <sub>2</sub> JA | HN24  | 3 | 0.55493   | 0.064682   | 0.032474*              |
| JA                | LN0   | 3 | 0.26558   | 0.026563   |                        |
| JA                | HN0   | 3 | 0.09045   | 0.0031134  | 0.002812**             |
| JA                | LN3   | 3 | 3.5483    | 0.16502    |                        |
| JA                | HN3   | 3 | 0.30993   | 0.03227    | 0.000043***            |
| JA                | LN9   | 3 | 10.863    | 0.42256    |                        |
| JA                | HN9   | 3 | 1.1597    | 0.13134    | 0.000026***            |
| JA                | LN24  | 3 | 41.112    | 1.861      |                        |
| JA                | HN24  | 3 | 0.36513   | 0.037979   | 0.000026***            |
| JA-Ile            | LN0   | 3 | 0.020587  | 0.002103   |                        |
| JA-Ile            | HN0   | 3 | 0.0074667 | 0.00087891 | 0.004517**             |
| JA-Ile            | LN3   | 3 | 2.9708    | 0.25201    |                        |
| JA-Ile            | HN3   | 3 | 0.15826   | 0.016319   | 0.007734**             |
| JA-Ile            | LN9   | 3 | 4.2715    | 0.23624    |                        |
| JA-Ile            | HN9   | 3 | 0.34255   | 0.02287    | 0.003348**             |
| JA-Ile            | LN24  | 3 | 9.6662    | 0.15061    |                        |
| JA-Ile            | HN24  | 3 | 0.16707   | 0.018999   | 0.000205***            |
| JA-Phe            | LN0   | 3 | 0.038957  | 0.0040445  |                        |
| JA-Phe            | HN0   | 3 | 0.01008   | 0.0011225  | 0.002339**             |
| JA-Phe            | LN3   | 3 | 0.22266   | 0.02573    |                        |
| JA-Phe            | HN3   | 3 | 0.068657  | 0.0083645  | 0.004705**             |
| JA-Phe            | LN9   | 3 | 0.082487  | 0.0019584  |                        |
| JA-Phe            | HN9   | 3 | 0.12046   | 0.013347   | 0.048077*              |
| JA-Phe            | LN24  | 3 | 0.21823   | 0.0029016  |                        |
| JA-Phe            | HN24  | 3 | 0.020547  | 0.0019797  | 5.9682E-7***           |
| JA-Val            | LN0   | 3 | 0         | 0          |                        |
| JA-Val            | HN0   | 3 | 0         | 0          | 0                      |
| JA-Val            | LN3   | 3 | 0.063427  | 0.0075762  |                        |
| JA-Val            | HN3   | 3 | 0.0028267 | 0.00023362 | 0.015203*              |

| Index  | Group | N | Mean      | SE         | P           |
|--------|-------|---|-----------|------------|-------------|
| JA-Val | LN9   | 3 | 0.11148   | 0.011894   |             |
| JA-Val | HN9   | 3 | 0.00939   | 0.00078143 | 0.001021**  |
| JA-Val | LN24  | 3 | 0.37536   | 0.016825   |             |
| JA-Val | HN24  | 0 | 0.0051467 | 0.00046484 | 0.000025*** |
| MeJA   | LN0   | 0 | 0         | 0          | 0           |
| MeJA   | HN0   | 0 | 0         | 0          |             |
| MeJA   | LN3   | 0 | 0         | 0          | 0           |
| MeJA   | HN3   | 0 | 0         | 0          |             |
| MeJA   | LN9   | 3 | 0.29339   | 0.027095   |             |
| MeJA   | HN9   | 3 | 0         | 0          | 0.008422**  |
| MeJA   | LN24  | 0 | 4.45      | 0.18713    |             |
| MeJA   | HN24  | 0 | 0         | 0          | 0.001764**  |
| OPDA   | LN0   | 3 | 0.71137   | 0.053394   |             |
| OPDA   | HN0   | 3 | 0.12473   | 0.0084118  | 0.007061**  |
| OPDA   | LN3   | 3 | 1.4097    | 0.14901    |             |
| OPDA   | HN3   | 3 | 0.12571   | 0.012138   | 0.001010**  |
| OPDA   | LN9   | 3 | 0.88578   | 0.11306    |             |
| OPDA   | HN9   | 3 | 0.27133   | 0.012071   | 0.031014*   |
| OPDA   | LN24  | 3 | 2.1564    | 0.23671    |             |
| OPDA   | HN24  | 3 | 0.23775   | 0.022316   | 0.001281**  |
| SA     | LN0   | 3 | 50.919    | 1.2887     |             |
| SA     | HN0   | 3 | 43.618    | 1.0607     | 0.011926*   |
| SA     | LN3   | 3 | 133.16    | 4.5977     |             |
| SA     | HN3   | 3 | 59.584    | 2.4878     | 0.000148*** |
| SA     | LN9   | 3 | 488.3     | 6.7789     |             |
| SA     | HN9   | 3 | 137.07    | 2.5638     | 0.000001*** |
| SA     | LN24  | 3 | 450.86    | 10.023     |             |
| SA     | HN24  | 3 | 126.25    | 6.4854     | 0.000011*** |
| SAG    | LN0   | 3 | 3456.5    | 213.67     |             |
| SAG    | HN0   | 3 | 407.7     | 17.739     | 0.004645**  |
| SAG    | LN3   | 3 | 1983.3    | 211.93     |             |
| SAG    | HN3   | 3 | 304.86    | 33.015     | 0.001440**  |
| SAG    | LN9   | 3 | 3805.1    | 237.02     |             |
| SAG    | HN9   | 3 | 738.59    | 42.776     | 0.004785**  |
| SAG    | LN24  | 3 | 3178.4    | 47.493     |             |
| SAG    | HN24  | 3 | 543.14    | 45.024     | 0.000002*** |

Asterisks (\*) indicate a significant difference from the indicated samples at \*  $P < 0.05$ , \*\*  $P < 0.01$  or \*\*\*  $p < 0.001$  by Student's t-test, ns means no significant difference.
